# Supplementary material for: Network pharmacology-based identification of the antitumor effects of taraxasterol in gastric cancer
Source: PubMed Central journal article supplement — Int J Immunopathol Pharmacol. 2020 Jul 23;34:2058738420933107. doi: 10.1177/2058738420933107 (PMC7378706; doi:10.1177/2058738420933107), 2020-07-23
Supplement: Supplementary_1.pdf [file Supplementary_1.pdf]

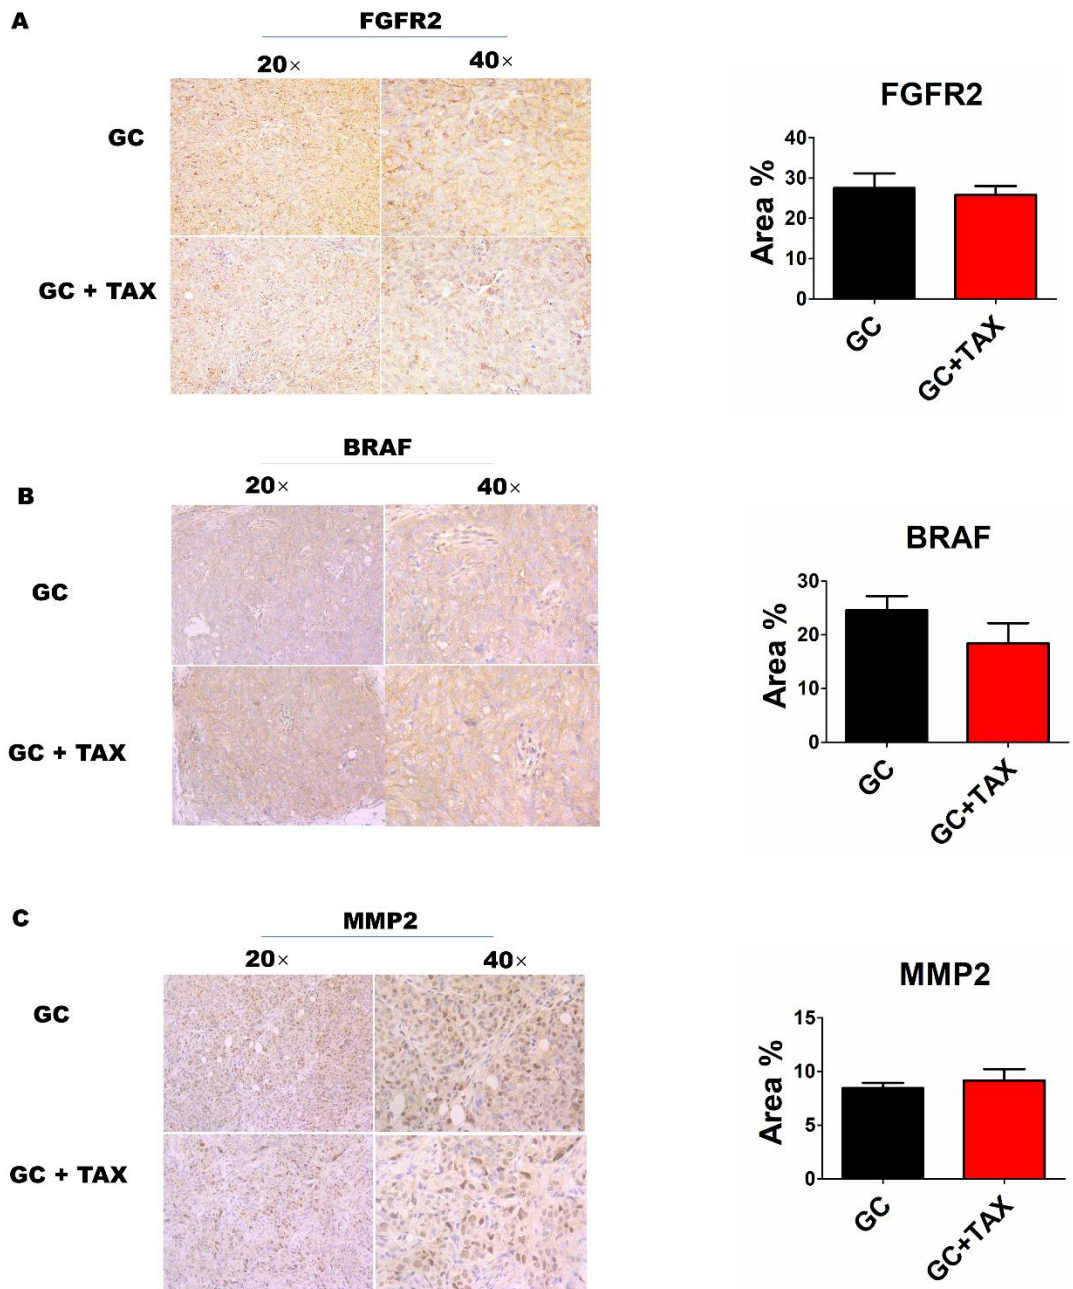

**Supplementary Fig S1.** The protein expression levels of FGFR2, BRAF, MMP2 were verified by IHC analysis in tumor tissues in two groups. (A) The protein expression levels of FGFR2. (B) The protein expression levels of BRAF. (C) The protein expression levels of MMP2. Data are the means  $\pm$  SEM of two experiments.
